# Supplementary material for: Polyester or epoxy: assessing embedding product efficacy in paleohistological methods
Source: PeerJ. 2020 Dec 15;8:e10495. doi: 10.7717/peerj.10495 (PMC7747682; doi:10.7717/peerj.10495)
Supplement: Supplemental Information 1 — Multiple thin sections were generated for some specimens. Individual section thickness is presented for each generated slide. [file peerj-08-10495-s001.xlsx]

## Sheet: Sheet1
Specimen	Project Label	Sections	Embed Material	Mounting Glue	Slide Type	Ending Thickness	Thickness at Loss
Indeterminate Turtle Femur	Femur 1
		Fe1 A.2-1	Epothin 1	CPA Medium	Plastic	0.046	0.044
		Fe1 B.1-1	Silmar	CPA Medium	Plastic	0.038	0.032
		Fe1 B.2-1	Silmar	CPA Medium	Plastic	0.09
Gar Scale	Scale 1
		Sca1A-1	Silmar	CPA Medium	Plastic	0.226
		Sca1B-1	Silmar	CPA Medium	Plastic	0.247
Indeterminate Crocodile Scute	Scute 1
		Scu1A-1	Silmar	CPA Medium	Plastic	0.064
		Scu1B-1	Silmar	CPA Medium	Plastic	0.076
Ornithopod Tooth	Tooth 1
		To1A-1	Silmar	CPA Medium	Plastic	0.066	0.045
		To1B-1	Silmar	CPA Medium	Plastic	0.065
Unknown Rib	Rib 1
		Rib1A.1-1	Silmar	CPA Medium	Plastic	0.067
		Rib1A.2-1	Silmar	CPA Medium	Plastic	0.044
		Rib1B.2-2	Epothin 1	CPA Medium	Plastic	0.06
Ceratopsian Tooth	Tooth 2
		To2-1	Epothin 1	CPA Medium	Plastic	0.091	0.019
		To2-3	Epothin 1	CPA Medium	Plastic	0.071
Domestic Chicken Humerus	Humerus 1
		H1-1	Silmar	CPA Medium	Plastic	0.087
		H1-3	Silmar	CPA Medium	Plastic	0.056
Domestic Chicken Femur	Femur 2
		Fe2-1	Silmar	CPA Medium	Plastic	0.076
		Fe2-3	Silmar	CPA Medium	Plastic	0.045
Domestic Chicken Tibia	Tibia 1
		T1-1	Silmar	CPA Medium	Plastic	0.113
		T1-2	Silmar	CPA Medium	Plastic	0.086
Unknown Fragment (Likely Rib)	Fragment 1
		Frag1.A-1	Silmar	CPA Medium	Plastic	0.08	0.067
		Frag1.B-1	Epothin 2	CPA Medium	Plastic	0.09	0.081
Nine-banded Armadillo	Calc 1
		Calc1-L2	Epothin 1	CPA Medium	Plastic	0.065
		Calc1-L3	Epothin 1	CPA Medium	Plastic	0.09	0.071
Nine-banded Armadillo	Calc 2
		Calc2-4	Silmar	CPA Medium	Plastic	0.055
		Calc2-5	Silmar	CPA Medium	Plastic	0.077	0.06
